# Supplementary material
Source: PubMed Central journal article supplement (PMC4804769)
Supplement: supp_btv377_Supplementary_Files_06_17.pdf [file supp_btv377_Supplementary_Files_06_17.pdf]

# Supplementary Materials for “Alternative preprocessing of RNA-Sequencing data in The Cancer Genome Atlas leads to improved analysis results ”

## Supplementary Figures

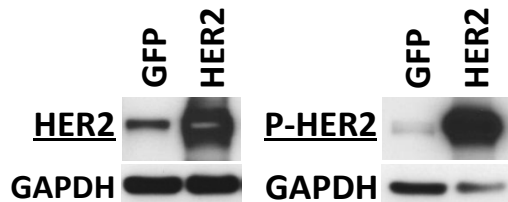

**Figure S1:** Western blots showing expression levels for HER2-activated and GFP-control cells. Lysates of HER2-adenovirus-vector (HER2) and green fluorescent protein (GFP) infected HMEC cells (18 hour infection) were generated, and expression of HER2 protein components were visualized by SDS-PAGE/Western blot. Western blots are shown for HER2 and phospho-Tyr1173-HER2 (P-HER2). GAPDH signal is used as an indication of loading equivalency.

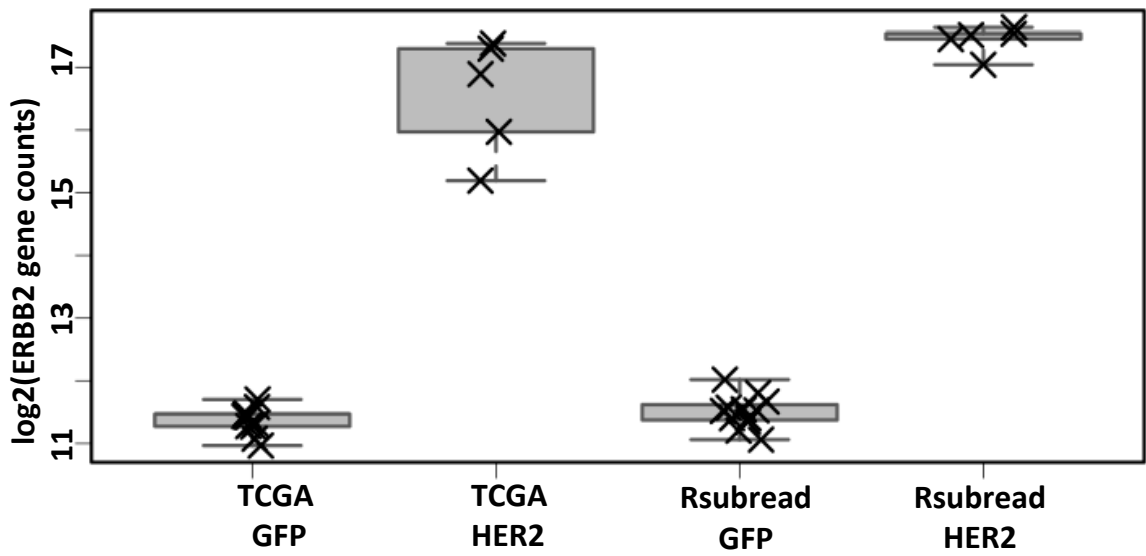

**Figure S2:** ERBB2 (HER2) raw gene counts produced using the TCGA and Rsubread pipelines. Log-transformed gene counts for the ERBB2 gene are shown for HER2-activated human mammary epithelial cells ( $n=5$ ) and for GFP-treated control cells ( $n=12$ ). For HER2-activated cells, the values were much more variable for the TCGA pipeline processed gene counts data (coefficient of variation = 0.53) than for the Rsubread data (coefficient of variation = 0.15). For the GFP-treated cells the coefficients of variation were similar for both methods (TCGA = 0.14, Rsubread = 0.18). In addition, the standardized mean difference between HER2-activated levels and GFP levels was greater for the Rsubread data (23.8) than for the TCGA data (10.0).

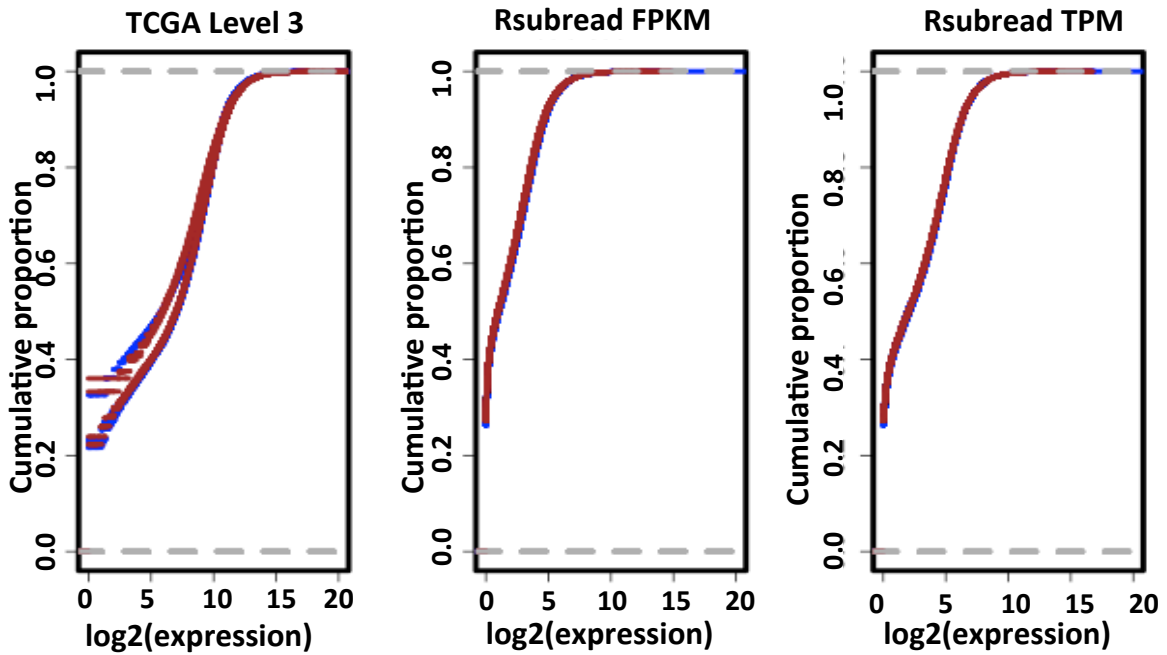

**Figure S3:** Empirical cumulative distribution of total mapped reads using normalized gene counts. In all cases, the cumulative distributions were more consistent for the Rsubread data than for the TCGA Level 3 data. The outlier samples for the TCGA Level 3 data are the same samples (GFP sample 4, HER2 samples 2 and 4) that showed visually different expression patterns in the heat maps (see Figure 1). GFP samples (n=12) are represented in blue and HER2 samples (n=5) are represented in brown color.

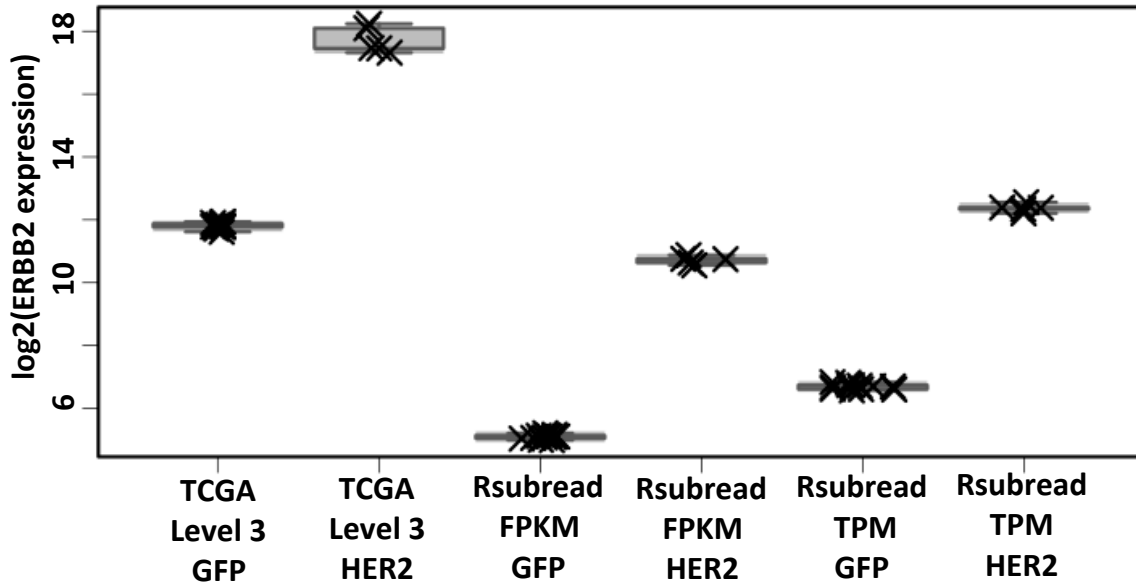

**Figure S4:** ERBB2 (HER2) normalized expression levels produced using the TCGA Level 3 and Rsubread pipelines. For HER2-activated cells, the values were more highly variable for the TCGA Level 3 data (coefficient of variation = 0.30) than for the Rsubread data (coefficient of variation for FPKM = 0.09, coefficient of variation for TPM = 0.06). In addition, the standardized mean difference between HER2-activated level and control levels was greater for the Rsubread data (FPKM = 66.9, TPM = 67.2) than for the TCGA Level data (25.8).

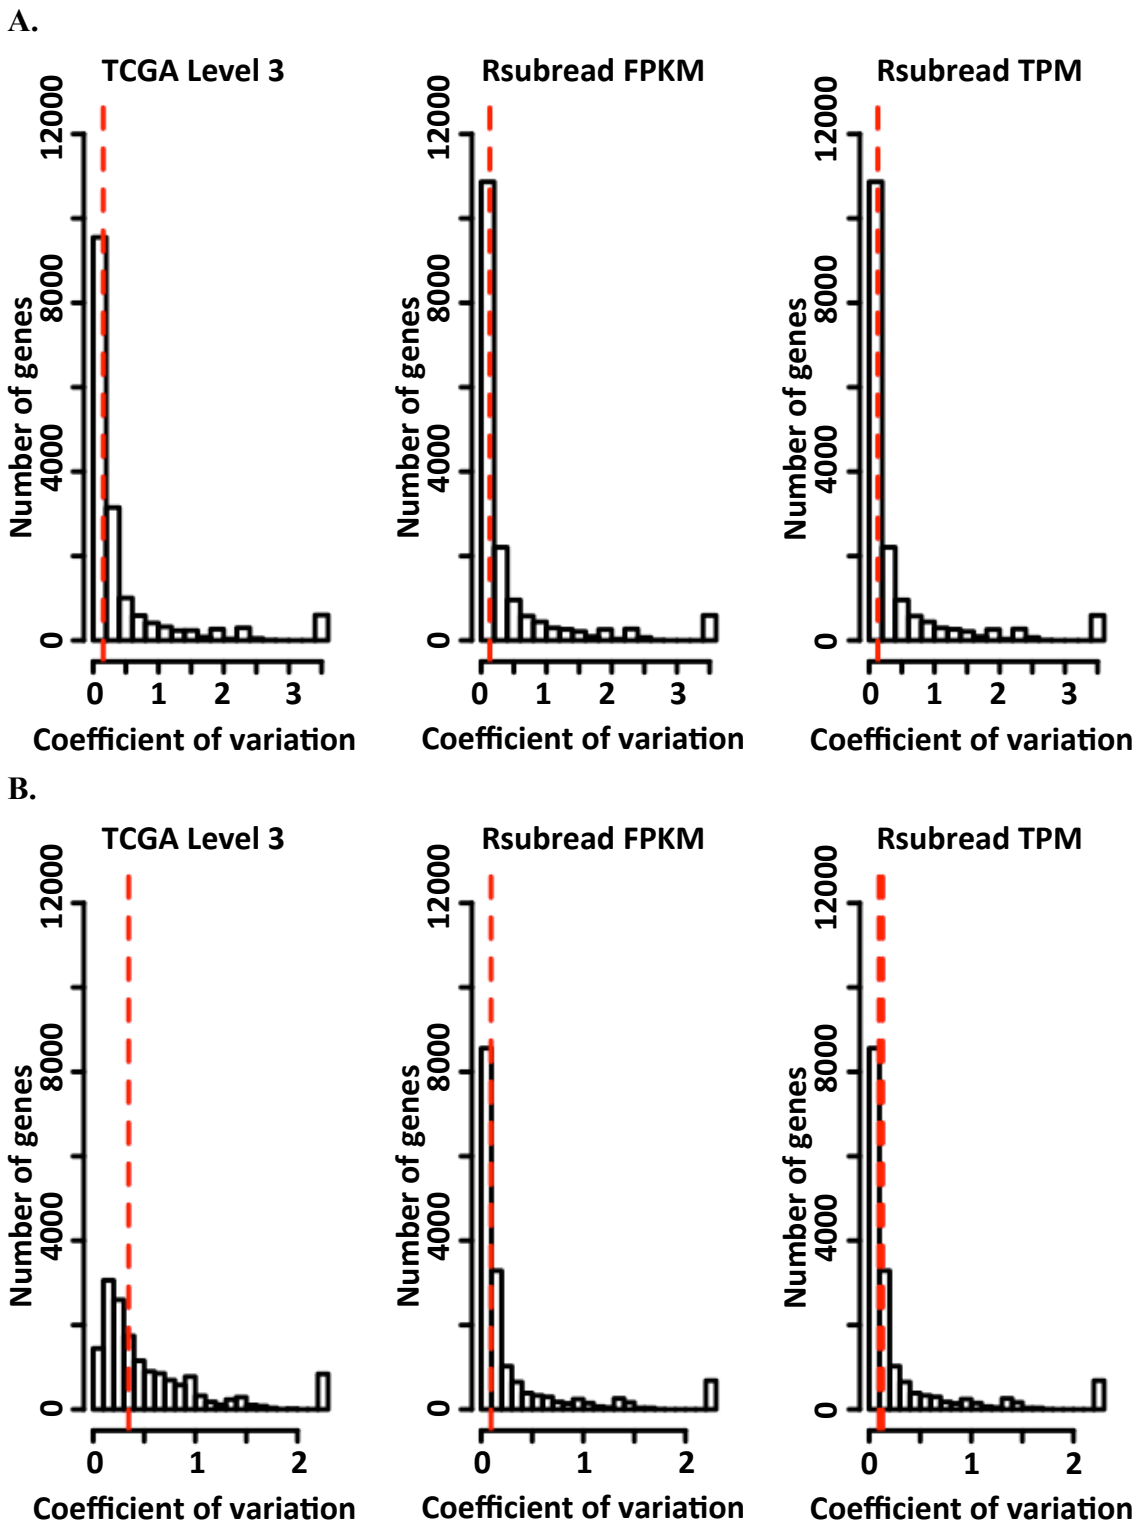

**Figure S5:** Histogram of coefficients of variation across (A) control and (B) HER2 overexpressed samples using 19584 common genes across the normalized gene

expression datasets. In all cases there were some genes with high coefficient of variation in expression values. However, Rsubread FPKM and TPM normalized data had a higher number of genes and a lower median coefficient of variation than the TCGA Level 3 upper quartile normalized data.

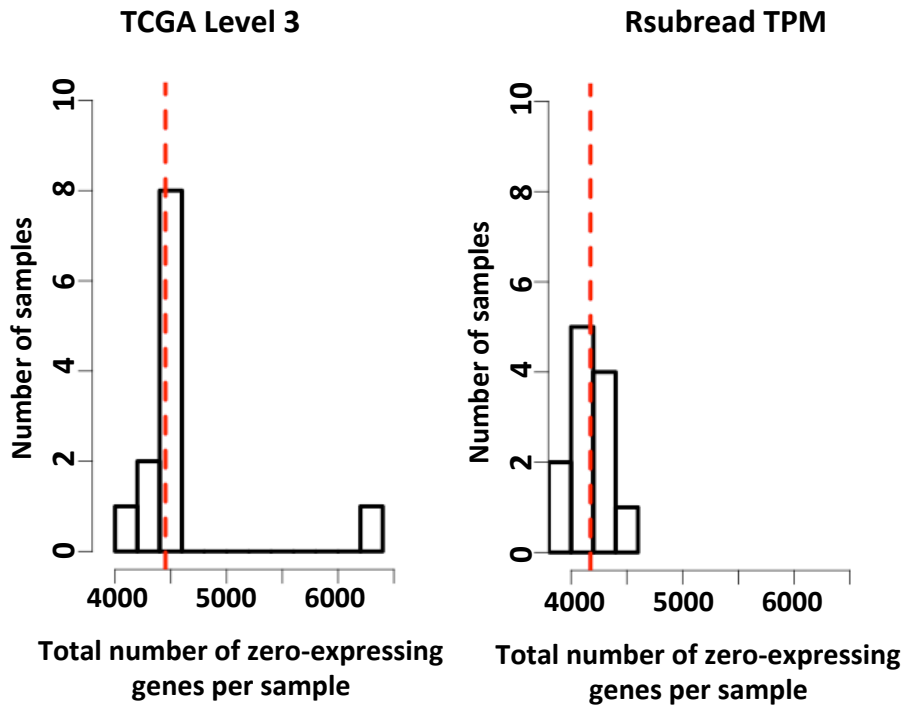

**Figure S6:** Distribution of number of zero expressing genes per HMEC GFP sample (n=12) for the TCGA Level 3 (median: 4452) and Rsubread TPM (median: 4174) methods.

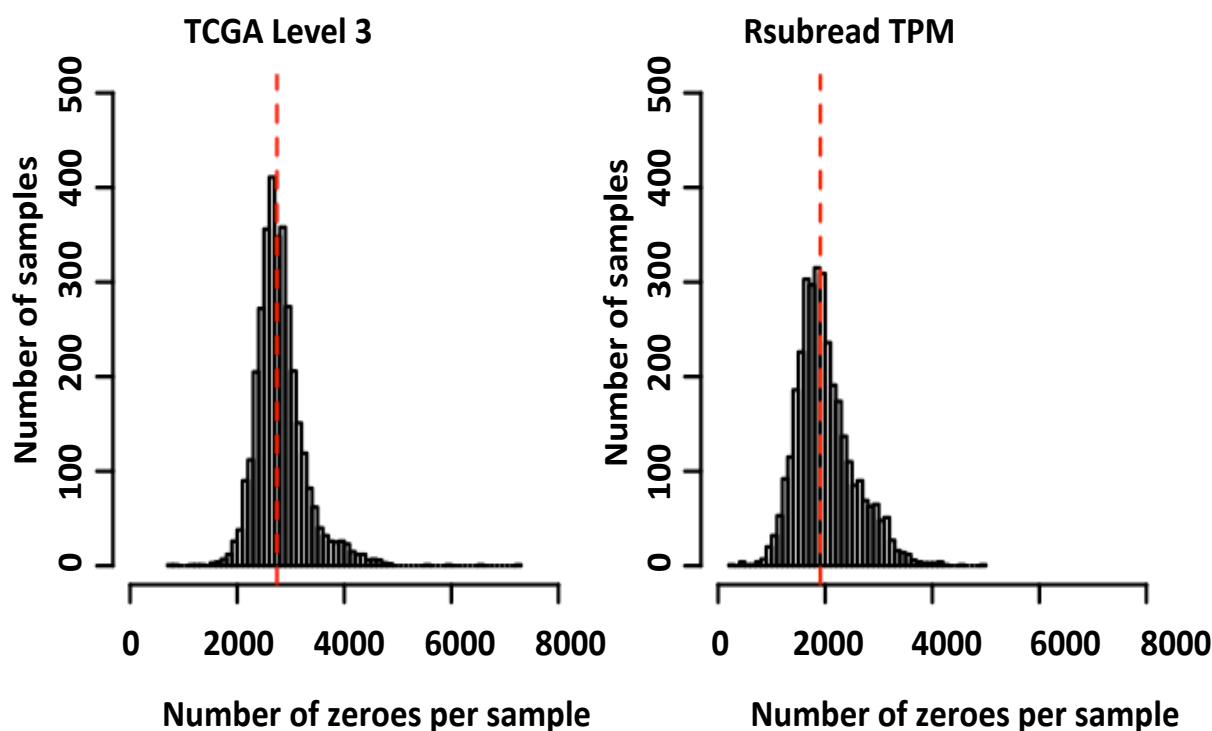

**Figure S7:** The number of genes per sample that each pipeline determined to have zero expression. We limited this analysis to the TCGA tumor samples (n=3380) and genes (n=19,584) that were common between the TCGA Pan-Cancer 12 dataset and our *Rsubread* processed dataset. The TCGA Level 3 samples had a higher number of zeroes per sample than the *Rsubread* samples (p-value<0.001). Vertical lines show the median value for each pipeline (TCGA Level 3 = 2742.5, *Rsubread* TPM =1910). In addition, the TCGA Level 3 data contained more extreme outliers.



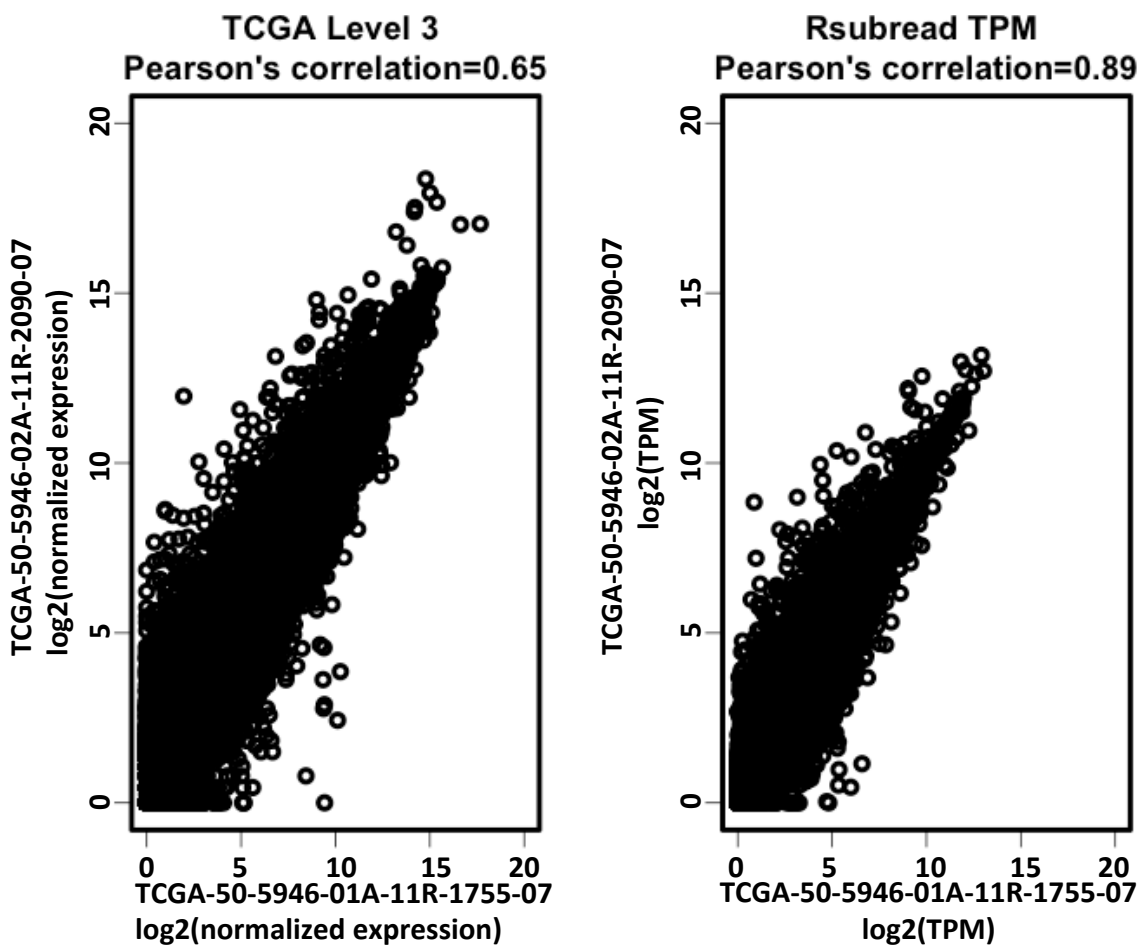

**Figure S8:** Scatter plots for two biological samples from patient TCGA-50-5946.

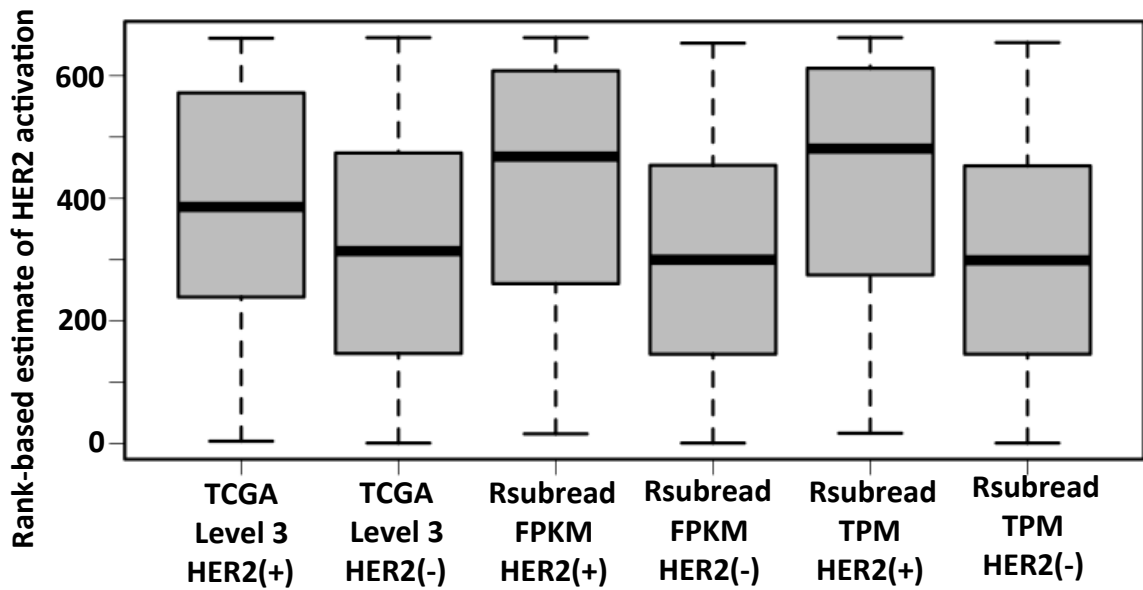

**Figure S9:** Signature-based estimates of HER2 activation in TCGA breast-cancer samples ( $n = 662$ ). We compared samples that had been identified via immunohistochemistry as either HER2 positive or negative. The standardized mean difference between HER2<sup>+</sup> and HER2<sup>-</sup> samples was higher for the Rsubread processed data (FPKM = 0.52, TPM = 0.59) than for the TCGA Level 3 data (0.44). For visual consistency across the comparisons, we converted the signature predictions to rank-based values (a higher rank indicates that a given sample was more likely to be HER2 positive).

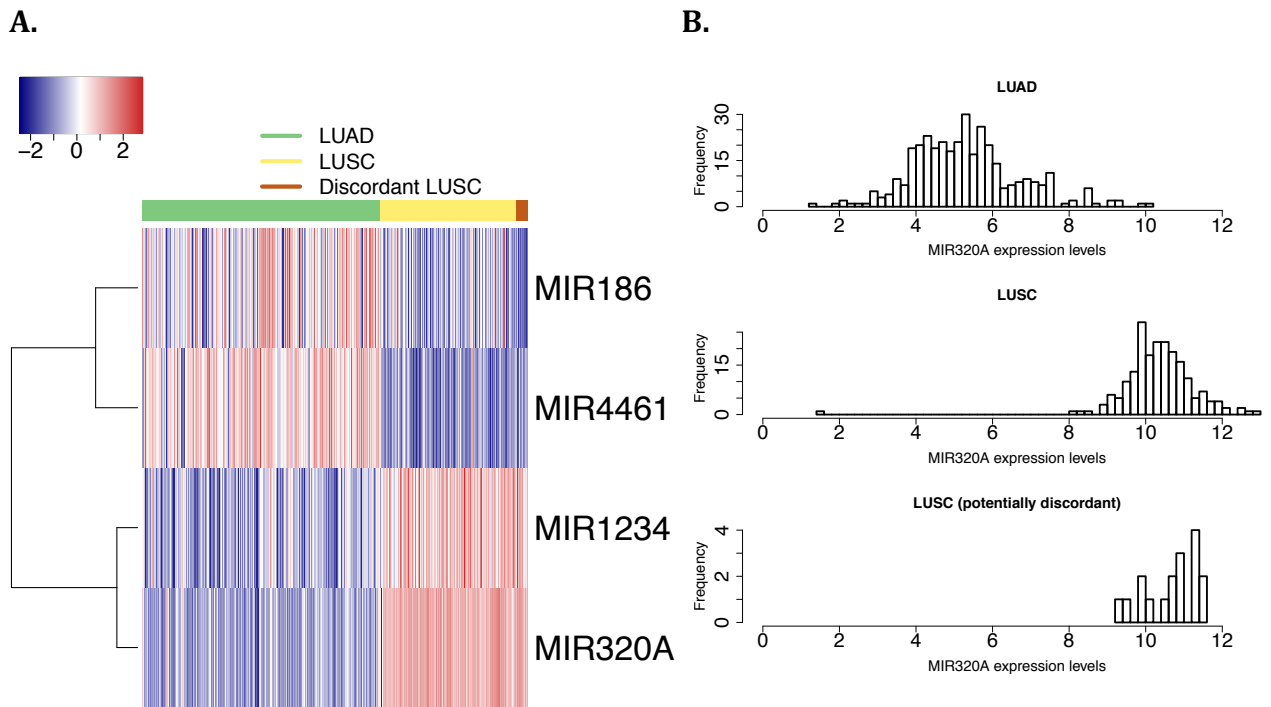

**Figure S10:** A. Gene expression patterns for four genes (non-coding RNA) that are consistent with LUAD and LUSC histological classification. The “Discordant LUSC” samples were identified by Cline et al. as exhibiting LUAD-like properties; however, expression levels for these genes, which are not included in the TCGA Level 3 data, are consistent with histological classification. B. Histograms showing expression levels for MIR320A gene in LUAD, LUSC and discordant LUSC samples. Expression levels for “LUSC Discordant” samples are highly concordant with LUSC samples.

## 1. Supplementary Tables

**Table S1:** Analyses scenarios, datasets and number of samples used in comparing TCGA Level 3 and Rsubread FPKM/TPM pipeline.

| <b>Analysis Name</b>                         | <b>Goal</b>                                                                                                              | <b>Datasets used</b>                                                   | <b>Number of samples used</b> |
|----------------------------------------------|--------------------------------------------------------------------------------------------------------------------------|------------------------------------------------------------------------|-------------------------------|
| Gene counts and normalized expression        | To compare gene level differences before and after normalization for the HER2 gene                                       | Our experimental HMEC dataset                                          | 17                            |
| Effect of upper quartile normalization       | To compare the number of zero-expressed genes in the dataset with common genes and samples                               | Common samples between TCGA PanCan 12 Level 3 and Rsubread TPM dataset | 3380                          |
| HER2 gene expression signature               | To compare gene expression based signatures with 200 genes                                                               | Our experimental HMEC dataset                                          | 17                            |
| HER2 status prediction using HER2 signatures | To predict HER2 status in TCGA BRCA samples where the HER2 status is known from immunohistochemistry                     | TCGA BRCA dataset and clinical dataset                                 | 662                           |
| Classifying TCGA lung samples                | To compare accuracy in classifying gene expression based lung adeno (LUAD) versus lung squamous carcinoma (LUSC) samples | TCGA LUAD and LUSC RNA-Seq datasets                                    | 575                           |

**Table S2: Comparison of standardized means**

Comparison of Hedge's standardized mean differences with all HMEC samples and with 2 HMEC outlier samples removed. For the *Rsubread* data, we used TPM values.

---

|                               | <b>All samples included<br/>[GFP n=12 and<br/>HER2 n=5]</b> |          | <b>Outlier samples removed<br/>[GFP n=12 and HER2 n=3]</b> |          |
|-------------------------------|-------------------------------------------------------------|----------|------------------------------------------------------------|----------|
|                               | TCGA<br>Level 3                                             | Rsubread | TCGA<br>Level 3                                            | Rsubread |
| Normalized<br>HER2 expression | 25.8                                                        | 67.2     | 64.77                                                      | 81.86    |
| HER2 predictions              | 0.44                                                        | 0.59     | 0.40                                                       | 0.55     |

---

**Table S3: Comparison of Pearson's correlation coefficients for biological replicates**

Pearson correlation coefficients for 13 samples that had been profiled twice with RNA-Seq in our data set and in the PANCAN12 data set.

| <b>Replicate_1</b>           | <b>Replicate_2</b>           | <b>TCGA<br/>Level 3</b> | <b>Rsubread<br/>TPM</b> |
|------------------------------|------------------------------|-------------------------|-------------------------|
| TCGA-06-0125-01A-01R-1849-01 | TCGA-06-0125-02A-11R-2005-01 | 0.89                    | 0.88                    |
| TCGA-06-0190-01A-01R-1849-01 | TCGA-06-0190-02A-01R-2005-01 | 0.72                    | 0.88                    |
| TCGA-06-0210-01A-01R-1849-01 | TCGA-06-0210-02A-01R-2005-01 | 0.79                    | 0.83                    |
| TCGA-06-0211-01B-01R-1849-01 | TCGA-06-0211-02A-02R-2005-01 | 0.89                    | 0.88                    |
| TCGA-14-1034-01A-01R-1849-01 | TCGA-14-1034-02B-01R-2005-01 | 0.75                    | 0.78                    |
| TCGA-19-4065-01A-01R-2005-01 | TCGA-19-4065-02A-11R-2005-01 | 0.63                    | 0.82                    |
| TCGA-50-5066-01A-01R-1628-07 | TCGA-50-5066-02A-11R-2090-07 | 0.68                    | 0.80                    |
| TCGA-50-5946-01A-11R-1755-07 | TCGA-50-5946-02A-11R-2090-07 | 0.65                    | 0.89                    |
| TCGA-BH-A18V-01A-11R-A12D-07 | TCGA-BH-A18V-06A-11R-A213-07 | 0.80                    | 0.89                    |
| TCGA-BH-A1FE-01A-11R-A13Q-07 | TCGA-BH-A1FE-06A-11R-A213-07 | 0.69                    | 0.65                    |
| TCGA-E2-A15A-01A-11R-A12D-07 | TCGA-E2-A15A-06A-11R-A12D-07 | 0.90                    | 0.93                    |
| TCGA-E2-A15E-01A-11R-A12D-07 | TCGA-E2-A15E-06A-11R-A12D-07 | 0.83                    | 0.86                    |
| TCGA-E2-A15K-01A-11R-A12P-07 | TCGA-E2-A15K-06A-11R-A12P-07 | 0.79                    | 0.85                    |

**Table S4: Coefficients for HER2 signature genes**

This table lists the 200 HER2-signature genes, along with coefficients identified using the two pipelines. Among these genes, 91-92 (~46%) genes were common between the TCGA Level 3 pipeline and *Rsubread* processed (FPKM and TPM) datasets, and 188 (94%) were common between FPKM and TPM data processed by *Rsubread*.

| <i>Rsubread</i>      |             |           |             |           |             |
|----------------------|-------------|-----------|-------------|-----------|-------------|
| TCGA RNA-Seq Level 3 |             | FPKM      |             | TPM       |             |
| Name                 | Coefficient | Name      | Coefficient | Name      | Coefficient |
| Intercept            | 4.524853    | Intercept | 0.168851    | Intercept | -0.504928   |
| ERBB2                | 0.164782    | ERBB2     | 0.257577    | ERBB2     | 0.305527    |
| HSPA7                | -0.125612   | HSPA7     | -0.187866   | HSPA6     | -0.15878    |
| GDF6                 | -0.111343   | HSPA6     | -0.136333   | HSPA7     | -0.151412   |
| HSPA6                | -0.097087   | GDF6      | 0.09874     | CCL2      | -0.106984   |
| CCL2                 | -0.093873   | DNAJA4    | -0.080598   | DNAJA4    | -0.09334    |
| CXCL10               | -0.092074   | KPRP      | 0.074612    | TNFAIP2   | -0.075825   |
| LOC338651            | 0.079326    | EEF1A2    | 0.069003    | HSPA1A    | -0.073306   |
| TNFSF14              | -0.07371    | TNFAIP2   | -0.06772    | EEF1A2    | 0.07144     |
| CD248                | -0.059249   | PDGFB     | 0.066514    | PDGFB     | 0.06787     |
| IFIT1                | -0.057644   | TSPAN18   | 0.066512    | EPGN      | -0.067303   |
| DNAJA4               | -0.053322   | HSPA1A    | -0.062749   | HSPA1B    | -0.066745   |
| GNAO1                | -0.050292   | ATP6V0A4  | 0.058443    | ATP6V0A4  | 0.062446    |
| CRHR1                | 0.048706    | CFB       | -0.058034   | CFB       | -0.060075   |
| EEF1A2               | 0.045896    | HSPA1B    | -0.057605   | CALB2     | 0.05829     |
| HSPA1B               | -0.045632   | EPGN      | -0.057545   | CRYAB     | -0.054796   |
| CCL20                | -0.044527   | CALB2     | 0.054193    | SAA2      | -0.050794   |
| TNFAIP2              | -0.04433    | PNMA2     | 0.048449    | PNMA2     | 0.0504      |
| LOC91948             | 0.042751    | SAA2      | -0.047311   | KRT80     | 0.050203    |
| ATP6V0A4             | 0.038768    | CRYAB     | -0.046179   | TNFRSF11B | 0.048283    |
| CFB                  | -0.03783    | KRT80     | 0.045195    | UCA1      | 0.046302    |
| CALB2                | 0.036782    | SRMS      | 0.043627    | CXCL5     | -0.045923   |
| PADI1                | 0.035659    | GPR1      | -0.04332    | ANGPTL7   | -0.04499    |
| PDGFB                | 0.034971    | UCA1      | 0.041757    | KPRP      | 0.044522    |
| LOC285629            | -0.034876   | TNFRSF11B | 0.041583    | SOD2      | -0.044234   |
| CRYAB                | -0.032468   | FAM83A    | 0.040141    | SYTL5     | 0.043949    |
| GABRA2               | 0.030593    | EPHA3     | -0.039923   | KRT19     | 0.043441    |

*Rsubread*

| TCGA RNA-Seq Level 3 |           | FPKM      |           | TPM       |           |
|----------------------|-----------|-----------|-----------|-----------|-----------|
| SOD2                 | -0.028653 | CXCL5     | -0.039762 | AKAP12    | 0.043351  |
| ULBP1                | -0.028346 | RGS2      | -0.039724 | SRMS      | 0.042485  |
| KRT18                | 0.028246  | DDAH1     | 0.039198  | PADI1     | 0.042177  |
| GPR1                 | -0.027639 | ULBP1     | -0.038466 | GPR1      | -0.041418 |
| CXCL5                | -0.027617 | AKAP12    | 0.038418  | RGS2      | -0.041195 |
| EPHA3                | -0.026868 | SOD2      | -0.037183 | MYADM     | 0.040819  |
| IL8                  | -0.025943 | KRT19     | 0.036641  | SHC4      | 0.04055   |
| EPHA4                | -0.025735 | TLR3      | -0.035985 | BST2      | -0.039644 |
| TLR3                 | -0.025646 | SHC4      | 0.035642  | EPHA3     | -0.0395   |
| HSPB8                | -0.025054 | PPP1R3C   | -0.035295 | KLK6      | 0.038871  |
| RPSAP52              | 0.02498   | PTK6      | 0.034658  | KRT18     | 0.038599  |
| RGS2                 | -0.024874 | SPON1     | 0.034473  | SAA1      | -0.038474 |
| SLC2A12              | -0.024861 | MYADM     | 0.034361  | SPON1     | 0.038178  |
| KRT19                | 0.024626  | BST2      | -0.034136 | HSP90AA1  | -0.038082 |
| TRANK1               | -0.024277 | GRAMD2    | -0.034067 | TSPAN18   | 0.037454  |
| MGP                  | 0.023918  | SAA1      | -0.033523 | EPHA4     | -0.037243 |
| SAA1                 | -0.023534 | HSP90AA1  | -0.032999 | ANGPTL4   | 0.036491  |
| SHC4                 | 0.022446  | KRT18     | 0.032801  | PAQR7     | -0.036256 |
| KITLG                | -0.022152 | EPHA4     | -0.032767 | ULBP1     | -0.035505 |
| KRT8                 | 0.022084  | PIK3C2B   | -0.032631 | HSPH1     | -0.035296 |
| CGNL1                | -0.021984 | KLK6      | 0.032407  | PGM2L1    | 0.035069  |
| MYCL1                | -0.021942 | CXCR1     | 0.031954  | CRHR1     | 0.034918  |
| ANGPTL4              | 0.02165   | PGM2L1    | 0.031133  | SERPINB13 | -0.03484  |
| PARP9                | -0.021303 | ANGPTL4   | 0.031075  | PIK3C2B   | -0.034825 |
| DNAJB4               | -0.021262 | PAQR7     | -0.031038 | PTK6      | 0.034722  |
| SPON1                | 0.021236  | DAPK1     | -0.030705 | CXCR1     | 0.034384  |
| PIK3C2B              | -0.021143 | FAM198B   | -0.03023  | FAM198B   | -0.034254 |
| PARP14               | -0.021042 | SERPINB13 | -0.030208 | GRAMD2    | -0.034033 |
| SERPINB1             | 0.020839  | GBP6      | -0.030003 | DDAH1     | 0.033964  |
| CXCL2                | -0.020713 | VWA1      | 0.029805  | GPRC5A    | 0.033659  |
| SERPINB13            | -0.020613 | SLC1A1    | 0.029764  | DAPK1     | -0.03362  |
| SNX9                 | 0.020262  | HSPH1     | -0.029464 | SLC1A1    | 0.033565  |
| TRIM22               | -0.020121 | KITLG     | -0.028275 | VWA1      | 0.033251  |
| DNAJB1               | -0.019926 | GPRC5A    | 0.027836  | DNAJA1    | -0.032433 |



*Rsubread*

| TCGA RNA-Seq Level 3 |           | FPKM      |           | TPM       |           |
|----------------------|-----------|-----------|-----------|-----------|-----------|
| KANK4                | -0.019885 | HSPB8     | -0.027616 | SNX9      | 0.032379  |
| GBP6                 | -0.019667 | SNX9      | 0.027574  | KITLG     | -0.032252 |
| MLPH                 | 0.019478  | DNAJA1    | -0.026591 | HSPB8     | -0.032155 |
| APOL6                | -0.019334 | C10orf10  | 0.026544  | GBP6      | -0.031284 |
| OAS3                 | -0.019302 | SREK1IP1  | 0.026213  | C10orf10  | 0.030517  |
| HSP90AA1             | -0.019165 | GM2A      | -0.026028 | CCNA1     | 0.03031   |
| KRT81                | 0.019156  | C8orf84   | 0.025904  | GM2A      | -0.030108 |
| GM2A                 | -0.019126 | CCNA1     | 0.025808  | C8orf84   | 0.029972  |
| ENGASE               | -0.017973 | TRIM22    | -0.025731 | ALDH1A3   | 0.02968   |
| KRT75                | 0.017856  | APOL6     | -0.025483 | TRIM22    | -0.029548 |
| CBLC                 | 0.017765  | KRT8      | 0.025158  | SREK1IP1  | 0.029351  |
| CCNA1                | 0.017623  | DNAJB4    | -0.025018 | KRT8      | 0.029074  |
| FERMT2               | 0.017321  | TCF4      | -0.024505 | NOTCH1    | -0.028721 |
| CEACAM1              | 0.01713   | NOTCH1    | -0.024433 | DNAJB4    | -0.028676 |
| SLC13A5              | 0.017066  | ALDH1A3   | 0.024322  | FERMT2    | 0.027438  |
| MTSS1L               | -0.017003 | MAFF      | 0.023981  | EMP1      | 0.027141  |
| TCF4                 | -0.016884 | PARP14    | -0.023917 | MAFF      | 0.026901  |
| PLAUR                | 0.016528  | FERMT2    | 0.023615  | TCF4      | -0.02667  |
| GPR110               | 0.01633   | IL7R      | -0.023182 | DNAJB1    | -0.02646  |
| TP53AIP1             | -0.016244 | LOC644961 | 0.023169  | PARP14    | -0.026319 |
| APAF1                | 0.016161  | KHDRBS3   | 0.022993  | PLAUR     | 0.026168  |
| HSPH1                | -0.016115 | EMP1      | 0.022449  | LOC644961 | 0.026082  |
| RAB6B                | 0.016005  | KMO       | -0.022438 | KHDRBS3   | 0.02565   |
| LOXL4                | 0.015594  | PLAUR     | 0.022023  | PLAU      | 0.025228  |
| OSBP2                | 0.015384  | DNAJB1    | -0.022019 | KANK4     | -0.02509  |
| HSPA8                | -0.015298 | IFIT5     | -0.021954 | ESR1      | -0.02467  |
| UNC5B                | -0.015048 | RAPH1     | 0.02169   | APOL6     | -0.024617 |
| RASA3                | 0.014898  | KANK4     | -0.021458 | KCNN4     | 0.024463  |
| KCNN4                | 0.014783  | DUSP10    | 0.020861  | IGFL3     | -0.024452 |
| ANPEP                | 0.014734  | SMO       | -0.020834 | MTSS1L    | -0.02421  |
| AMACR                | -0.01448  | DFNB31    | -0.020759 | RAPH1     | 0.024168  |
| ZC3HAV1              | -0.01428  | MTSS1L    | -0.020665 | IFIT5     | -0.024094 |
| COBLL1               | -0.014277 | PLAU      | 0.020509  | DUSP10    | 0.024043  |
| ECT2                 | 0.014259  | KCNN4     | 0.020505  | PMP22     | 0.023801  |

---

*Rsubread*

---

| <b>TCGA RNA-Seq Level 3</b> |           | <b>FPKM</b> |           | <b>TPM</b> |           |
|-----------------------------|-----------|-------------|-----------|------------|-----------|
| SMURF2                      | 0.014218  | PMP22       | 0.02033   | VASP       | 0.023373  |
| CBR1                        | -0.014049 | STX2        | 0.020322  | ARRDC4     | -0.023118 |
| TUFT1                       | 0.013455  | VASP        | 0.02023   | SMO        | -0.023104 |
| C1R                         | -0.013313 | IGFL3       | -0.020208 | FAM176A    | 0.022803  |
| SESN2                       | -0.013303 | POU2F1      | 0.020096  | CBR1       | -0.022764 |
| TWF2                        | 0.013165  | WWTR1       | 0.01976   | WWTR1      | 0.022599  |
| INPP4B                      | 0.013134  | FAM176A     | 0.019732  | PGF        | 0.022576  |
| SMO                         | -0.013129 | PGF         | 0.019637  | STX2       | 0.022286  |
| ITGB3                       | 0.013106  | ARRDC4      | -0.019625 | ZPLD1      | 0.022175  |
| CAST                        | 0.013084  | TNS3        | -0.019394 | KMO        | -0.022123 |
| FBXW7                       | -0.013061 | CBR1        | -0.019365 | FAM214B    | 0.021843  |
| VASP                        | 0.012979  | RASA3       | 0.019126  | TUFT1      | 0.021717  |
| SASH1                       | -0.012828 | APAF1       | 0.01874   | TNS3       | -0.021558 |
| MT2A                        | 0.012725  | HERC3       | 0.018697  | MAP6       | 0.021499  |
| NAV3                        | 0.012684  | HMGB3       | 0.018691  | ST3GAL4    | 0.021422  |
| NET1                        | 0.012572  | ZXDB        | 0.01865   | HMGB3      | 0.021401  |
| CGN                         | 0.012481  | ST3GAL4     | 0.018588  | HS6ST1     | -0.021304 |
| SYTL2                       | -0.01244  | HS6ST1      | -0.018541 | DLC1       | -0.021275 |
| CYBASC3                     | -0.012341 | IGF2BP3     | 0.018523  | POU2F1     | 0.021216  |
| ST3GAL4                     | 0.012295  | TUFT1       | 0.018493  | APAF1      | 0.021057  |
| TNS3                        | -0.012073 | FAM214B     | 0.018467  | STOX2      | -0.020845 |
| BCAR3                       | 0.011678  | NET1        | 0.017866  | RASA3      | 0.020767  |
| SEC24D                      | 0.011623  | XPC         | -0.017726 | HERC3      | 0.020487  |
| DTX4                        | -0.011553 | FBXO22      | -0.017678 | DFNB31     | -0.020337 |
| PYGB                        | 0.011389  | MR1         | -0.017472 | FBXO22     | -0.02015  |
| MYO1E                       | 0.011297  | CYBASC3     | -0.017218 | BRMS1      | -0.020097 |
| PTPRE                       | 0.011089  | KCNJ5       | -0.017167 | IER3       | 0.020017  |
| GFPT1                       | 0.011087  | IER3        | 0.017056  | NET1       | 0.019989  |
| ACTB                        | 0.011033  | NME7        | 0.016958  | CYBASC3    | -0.019984 |
| STIM2                       | -0.011012 | PYGB        | 0.016808  | PYGB       | 0.01983   |
| XPC                         | -0.011008 | NAV3        | 0.016742  | XPC        | -0.019811 |
| MFI2                        | 0.01095   | BRMS1       | -0.016648 | BCAR3      | 0.019647  |
| NFATC3                      | -0.010879 | ARV1        | -0.016434 | ZXDB       | 0.019586  |
| C19orf66                    | -0.010511 | BCAR3       | 0.016403  | CELF2      | 0.019402  |

---

*Rsubread*

| TCGA RNA-Seq Level 3 |           | FPKM     |           | TPM      |           |
|----------------------|-----------|----------|-----------|----------|-----------|
| PDZD2                | -0.010452 | ARHGAP12 | 0.016383  | IGF2BP3  | 0.019325  |
| ARHGEF2              | 0.010354  | PPP3CC   | 0.016377  | TIMP1    | -0.019048 |
| TRIOBP               | 0.010316  | PODXL2   | 0.016365  | ARHGAP12 | 0.01901   |
| SLC34A2              | -0.010288 | PDZD2    | -0.016253 | NME7     | 0.018951  |
| FRMD4A               | -0.010219 | TWF2     | 0.016132  | ARV1     | -0.018928 |
| MAP3K2               | -0.010081 | RBMS2    | 0.016093  | CASP1    | -0.018873 |
| NPAS2                | 0.010074  | CASP1    | -0.015992 | MR1      | -0.018826 |
| IGFL3                | -0.009956 | TIMP1    | -0.015829 | KCNJ5    | -0.018762 |
| ARHGAP12             | 0.009927  | LRRC8C   | 0.015828  | LRRC8C   | 0.018716  |
| SH2D3A               | 0.009911  | SH3KBP1  | 0.015714  | TWF2     | 0.018592  |
| NAV2                 | -0.009866 | CAST     | 0.015525  | PPP3CC   | 0.018547  |
| SMOC1                | 0.009764  | TP53AIP1 | -0.0153   | ANKRD33B | -0.018542 |
| HERPUD1              | 0.009567  | DAB2     | 0.015248  | CAST     | 0.018294  |
| WDR1                 | 0.009562  | FGFR2    | -0.01521  | SH3KBP1  | 0.017947  |
| RASA1                | 0.009529  | INPP4B   | 0.015146  | PODXL2   | 0.017847  |
| MBD4                 | -0.009337 | HMGN3    | -0.01512  | INPP4B   | 0.017676  |
| PLEK2                | 0.009276  | SESN1    | -0.014994 | TNS4     | 0.01766   |
| BCAP29               | 0.00927   | TRIOBP   | 0.01497   | DAB2     | 0.017551  |
| ATG16L1              | 0.009237  | GFPT1    | 0.014771  | MFI2     | 0.01754   |
| LDB1                 | -0.009222 | ARHGEF2  | 0.014671  | RBMS2    | 0.017501  |
| NCDN                 | -0.009177 | TNS4     | 0.014658  | FGFR2    | -0.017469 |
| NEK9                 | -0.009083 | MFI2     | 0.014631  | GFPT1    | 0.017427  |
| CSGALNACT2           | 0.009018  | CROT     | -0.014554 | TP53AIP1 | -0.017304 |
| ATP1B1               | -0.008895 | KIAA1671 | -0.013946 | NAV3     | 0.017121  |
| APBB2                | -0.008881 | ZNFX1    | -0.013815 | ARHGEF2  | 0.017063  |
| CAPN2                | 0.00888   | DNAJB9   | 0.013602  | SESN1    | -0.016845 |
| CALM2                | 0.008674  | NFE2L1   | -0.013277 | DNAJB9   | 0.016278  |
| TRAFD1               | -0.008589 | PIK3R1   | -0.013264 | NFE2L1   | -0.016229 |
| PGM1                 | 0.008555  | FBXW2    | -0.013023 | TRIOBP   | 0.016197  |
| FGFR2                | -0.008354 | RASSF1   | 0.012832  | KIAA1671 | -0.016057 |
| DOPEY1               | -0.008331 | MICALCL  | 0.01279   | ZNFX1    | -0.015835 |
| NISCH                | -0.008191 | SLC20A2  | 0.012767  | CROT     | -0.015664 |
| PI4KB                | -0.008141 | LDB1     | -0.012706 | SLC20A2  | 0.015334  |
| TOR3A                | -0.007819 | IGFBP4   | -0.012603 | B2M      | -0.015314 |

*Rsubread*

| TCGA RNA-Seq Level 3 |           | FPKM     |           | TPM      |           |
|----------------------|-----------|----------|-----------|----------|-----------|
| LRIG3                | 0.007766  | SEC24D   | 0.012592  | UBB      | -0.015001 |
| POLR2A               | -0.007749 | B2M      | -0.012511 | FBXW2    | -0.014918 |
| NEU1                 | -0.007665 | CCDC50   | 0.012451  | LDB1     | -0.014863 |
| KPNA4                | 0.007656  | SLC41A1  | -0.012315 | SEC24D   | 0.014746  |
| PIK3CD               | 0.007606  | TOR3A    | -0.01228  | MICALCL  | 0.014702  |
| ANKRD13A             | -0.007496 | HERPUD1  | 0.012254  | MYO1E    | 0.014521  |
| TBRG1                | -0.007462 | TRAFD1   | -0.012195 | RASSF1   | 0.014486  |
| EPS15                | 0.007458  | MYO1E    | 0.012108  | TOR3A    | -0.01446  |
| TRIM5                | -0.007361 | MEF2D    | 0.012092  | PIK3R1   | -0.014459 |
| PCSK7                | -0.007332 | FRMD4A   | -0.011928 | TRAFD1   | -0.014282 |
| ANKFY1               | -0.00732  | LRRFIP1  | 0.011781  | ANKRD13A | -0.014195 |
| C20orf194            | 0.007244  | ANKRD13A | -0.011763 | SLC41A1  | -0.014065 |
| C19orf42             | -0.007162 | PI4KB    | -0.011583 | MEF2D    | 0.013983  |
| ITGA5                | 0.007095  | PRRC1    | 0.011518  | PI4KB    | -0.013683 |
| ARHGEF12             | -0.006996 | UBB      | -0.011513 | LRRFIP1  | 0.013638  |
| STK40                | -0.006932 | FAM129B  | 0.011441  | PRRC1    | 0.013535  |
| MLLT6                | -0.006786 | PNMAL1   | -0.010498 | FRMD4A   | -0.012667 |
| C1orf85              | -0.006767 | LPP      | 0.010416  | PNMAL1   | -0.012235 |
| PTPN12               | 0.00648   | APBB2    | -0.010189 | LPP      | 0.011861  |
| MAP2K4               | -0.006351 | PRDM4    | -0.010085 | CAPN2    | 0.011646  |
| ZNF532               | -0.006134 | ADAR     | -0.010018 | ADAR     | -0.011625 |
| AFAP1L2              | 0.006103  | SEC14L1  | 0.009938  | PRDM4    | -0.011432 |
| ARID1B               | -0.005924 | CAPN2    | 0.009793  | APBB2    | -0.01135  |
| SEC14L1              | 0.005811  | ASAP2    | 0.009678  | SEC14L1  | 0.011315  |
| PLEKHA6              | -0.005776 | PPP2R5B  | 0.00955   | UBP1     | -0.010824 |
| ELOVL1               | 0.005764  | NFATC3   | -0.009429 | ASAP2    | 0.010731  |
| CLASP1               | -0.005727 | PRPSAP2  | -0.009416 | PRPSAP2  | -0.010671 |
| SMEK1                | -0.005478 | DCAF7    | 0.009216  | PPP2R5B  | 0.010646  |
| NUMA1                | -0.005168 | MEX3C    | 0.009174  | NFATC3   | -0.010535 |
| ZMYND8               | 0.005151  | AFAP1    | 0.009148  | AFAP1    | 0.010482  |
| PDXK                 | -0.005071 | UBP1     | -0.008794 | DCAF7    | 0.010296  |
| MYO10                | 0.004929  | ARHGEF12 | -0.008606 | MYL12A   | 0.009901  |
| UBP1                 | -0.00478  | SDC1     | 0.008466  | ARHGEF12 | -0.009895 |
| RCC2                 | 0.004742  | ADCY9    | -0.008152 | STAT3    | -0.009518 |

| <i>Rsubread</i>      |           |         |           |         |           |
|----------------------|-----------|---------|-----------|---------|-----------|
| TCGA RNA-Seq Level 3 |           | FPKM    |           | TPM     |           |
| SGK1                 | 0.004731  | STAT3   | -0.008103 | ANKRD27 | 0.008986  |
| RFWD3                | -0.004666 | ANKRD27 | 0.007958  | IFFO2   | 0.008553  |
| C20orf3              | -0.004354 | IFFO2   | 0.007081  | GTF2I   | -0.008151 |
| WDR91                | -0.004333 | GTF2I   | -0.006848 | CYB561  | 0.00765   |

**Table S5:** Coefficients of variation for HER status predictions in TCGA breast cancer samples.

| <b>HER2 status</b> | <b>Method used</b>   | <b>Coefficient of variation</b> |
|--------------------|----------------------|---------------------------------|
| HER2 (-)           | TCGA                 | 0.62                            |
|                    | <i>Rsubread</i> FPKM | 0.21                            |
|                    | <i>Rsubread</i> TPM  | 0.30                            |
| HER2 (+)           | TCGA                 | 0.72                            |
|                    | <i>Rsubread</i> FPKM | 0.14                            |
|                    | <i>Rsubread</i> TPM  | 0.20                            |
